# Supplementary material
Source: publisher figshare collection journal article supplement (https://acs.figshare.com/ndownloader/files/5979852)
Supplement: Supplementary file 1 [file 5979852]

8       31.735704000     18.602943000    -14.437787000
6       32.831886000     15.256537000    -13.061726000
6       31.594061000     14.673945000    -13.748979000
6       31.120825000     15.847636000    -14.629591000
6       32.458345000     16.417363000    -15.124781000
6       32.420899000     17.881165000    -15.511725000
8       33.386330000     16.247699000    -13.973285000
1       33.559217000     14.486044000    -12.815653000
1       30.857114000     14.269084000    -13.060419000
8       32.053754000     13.636703000    -14.683796000
1       31.529773000     13.847582000    -15.515385000
1       30.529463000     16.597872000    -14.109450000
1       32.812304000     15.816819000    -15.966410000
1       31.875134000     17.967823000    -16.459130000
1       33.446095000     18.241482000    -15.654453000
8       30.377869000     15.329558000    -15.778951000
7       32.463004000     15.946406000    -11.790356000
6       32.475420000     15.188712000    -10.592802000
8       32.786254000     13.965657000    -10.662878000
7       32.161411000     15.822613000     -9.427320000
6       31.825019000     17.135880000     -9.408143000
7       31.506839000     17.691644000     -8.237901000
6       31.829825000     17.905772000    -10.617604000
6       32.162561000     17.283760000    -11.776709000
1       31.511021000     17.132129000     -7.356915000
1       31.242571000     18.670548000     -8.198847000
1       31.580070000     18.955922000    -10.604337000
1       32.180184000     17.803359000    -12.730569000
8       32.991208000     12.739514000      0.318978000
6       33.730116000     11.305302000     -3.138741000
6       35.198419000     11.357802000     -2.682380000
6       35.119030000     11.538547000     -1.148816000
6       33.846398000     10.735499000     -0.792295000
6       33.090442000     11.266169000      0.409168000
8       32.966945000     10.824309000     -1.992094000
1       33.611773000     10.642940000     -3.998320000
1       35.773468000     12.127871000     -3.199137000
8       35.793584000     10.022575000     -2.802997000
1       36.223369000      9.926568000     -3.692617000
1       34.980070000     12.579890000     -0.863651000
1       34.122228000      9.689040000     -0.632430000
1       33.636249000     11.014842000      1.323176000
1       32.076066000     10.865053000      0.449876000
8       36.301847000     11.018088000     -0.506412000
7       32.453720000     14.382020000     -7.024245000
6       32.997644000     13.110743000     -7.063151000
7       33.237702000     12.581791000     -8.274231000
7       33.296690000     12.414383000     -5.951674000
6       33.006824000     13.074744000     -4.812310000
6       32.439206000     14.346331000     -4.673196000
6       32.122379000     15.083402000     -5.848572000
8       31.616073000     16.238109000     -5.913114000
7       32.280063000     14.668185000     -3.314997000
6       32.747912000     13.621535000     -2.651496000
7       33.214713000     12.619055000     -3.522143000
1       32.294371000     14.897983000     -7.939300000
1       33.040432000     13.082043000     -9.164156000
1       33.647114000     11.654608000     -8.298071000
1       32.776323000     13.479704000     -1.581024000
8       28.576989000     14.239244000    -14.356306000
6       29.102701000     12.384246000    -11.110635000
6       27.646855000     11.873437000    -11.235441000
6       27.298713000     12.288337000    -12.675500000
6       28.602337000     12.011909000    -13.424494000
6       28.825381000     12.822659000    -14.678054000
8       29.656166000     12.425604000    -12.452259000
1       29.702809000     11.741073000    -10.467300000
1       26.996648000     12.338457000    -10.494189000
8       27.613063000     10.419796000    -11.123276000
1       27.100194000     13.360376000    -12.695446000
1       28.687075000     10.940937000    -13.631547000
1       28.154003000     12.497088000    -15.475930000
1       29.868481000     12.697193000    -14.980944000
8       26.186323000     11.579016000    -13.265746000
7       28.834209000     14.520744000     -6.617965000
6       29.220387000     13.240655000     -6.975476000
7       29.460339000     12.356807000     -5.999260000
7       29.344512000     12.862705000     -8.258124000
6       29.095265000     13.854601000     -9.132241000
6       28.724696000     15.176647000     -8.875118000
6       28.539897000     15.561307000     -7.519307000
8       28.125767000     16.678670000     -7.080522000
7       28.519410000     15.861486000    -10.086594000
6       28.737598000     14.965549000    -11.039846000
7       29.102731000     13.715883000    -10.501764000
1       28.728557000     14.747504000     -5.588937000
1       29.304495000     12.562172000     -4.991143000
1       29.743509000     11.426779000     -6.287345000
1       28.665416000     15.104343000    -12.106476000
15      28.702101000     15.327404000    -15.599493000
8       28.167084000     14.726684000    -16.859724000
8       28.293784000     16.647589000    -15.025967000
8       28.418098000     15.565761000      2.039265000
6       28.397208000     13.035131000     -0.781407000
6       29.837194000     12.665542000     -0.367564000
6       29.968791000     13.388407000      0.986737000
6       28.584535000     13.188661000      1.609148000
6       28.175744000     14.231003000      2.619894000
8       27.660548000     13.302927000      0.440221000
1       27.916377000     12.238016000     -1.344999000
1       30.569799000     12.976221000     -1.110265000
8       29.899121000     11.226946000     -0.109116000
1       30.138919000     14.452491000      0.816506000
1       28.517991000     12.182542000      2.030071000
1       28.778374000     14.123938000      3.525650000
1       27.112720000     14.150875000      2.862045000
8       30.986984000     12.863357000      1.868104000
7       28.378643000     14.249287000     -1.640725000
6       28.637070000     14.041067000     -3.010759000
8       28.970098000     12.871366000     -3.371717000
7       28.494699000     15.082140000     -3.867202000
6       28.105147000     16.305008000     -3.423388000
7       27.914999000     17.264184000     -4.330997000
6       27.917119000     16.540146000     -2.016192000
6       28.061776000     15.492794000     -1.161547000
1       28.036128000     17.045490000     -5.340465000
1       27.404245000     18.113778000     -4.089195000
1       27.669558000     17.524674000     -1.649840000
1       27.973579000     15.575993000     -0.084090000
15      32.512318000     13.511041000      1.716813000
8       33.301152000     12.972188000      2.869461000
8       32.402337000     14.962909000      1.366196000
8       24.492130000     11.791473000    -11.383695000
6       23.824471000     11.134440000     -7.643576000
6       22.343337000     10.932621000     -8.017000000
6       22.430223000     10.962512000     -9.553773000
6       23.665879000     10.099078000     -9.818559000
6       24.338787000     10.341267000    -11.149179000
8       24.590939000     10.461337000     -8.691336000
1       24.077192000     10.712034000     -6.671552000
1       21.667632000     11.665792000     -7.574909000
8       21.955782000      9.566123000     -7.656821000
1       22.611791000     11.984123000     -9.885671000
1       23.396559000      9.046140000     -9.719273000
1       23.697875000      9.936404000    -11.937668000
1       25.327268000      9.880228000    -11.193395000
8       21.292516000     10.418133000    -10.256580000
7       24.169618000     15.433709000     -4.805561000
6       23.624263000     14.226854000     -4.516844000
7       23.569676000     13.158117000     -5.329535000
6       24.115607000     13.408777000     -6.541633000
6       24.711146000     14.610370000     -6.957148000
6       24.759435000     15.666602000     -6.018231000
7       25.343220000     16.851338000     -6.236109000
7       25.147280000     14.507094000     -8.282883000
6       24.826071000     13.273045000     -8.657845000
7       24.200163000     12.557130000     -7.628339000
1       23.229775000     14.142256000     -3.512100000
1       26.052446000     16.936007000     -6.966004000
1       25.336368000     17.555296000     -5.480169000
1       24.950333000     12.835779000     -9.636765000
15      24.681359000     12.234704000    -12.981328000
8       23.728068000     11.445728000    -13.824595000
8       24.784607000     13.728598000    -12.982791000
8       25.424863000     19.931017000      2.247056000
6       23.977409000     16.715286000      0.927790000
6       25.262282000     16.069223000      1.497478000
6       25.806116000     17.185215000      2.413557000
6       24.538952000     17.827340000      2.992297000
6       24.667780000     19.303333000      3.334494000
8       23.555295000     17.733981000      1.871763000
1       23.183933000     15.988695000      0.769296000
1       25.960663000     15.795105000      0.708120000
8       24.915948000     14.899252000      2.299215000
1       26.313449000     17.932453000      1.802361000
1       24.177097000     17.251839000      3.848143000
1       25.201367000     19.409231000      4.284647000
1       23.672754000     19.750165000      3.393082000
8       26.695094000     16.748282000      3.466200000
7       24.248926000     17.347387000     -0.382463000
6       24.009620000     16.560562000     -1.518796000
8       23.519314000     15.412107000     -1.434418000
7       24.385259000     17.144451000     -2.704187000
6       24.987893000     18.389493000     -2.869806000
8       25.411891000     18.738444000     -4.012907000
6       25.113528000     19.167956000     -1.664283000
1       25.501015000     20.173909000     -1.663425000
6       24.764625000     18.617904000     -0.476224000
1       24.269778000     16.515973000     -3.572045000
1       24.904587000     19.156519000      0.451349000
15      28.324716000     16.828991000      3.119789000
8       29.026986000     16.453105000      4.386905000
8       28.610803000     18.064155000      2.323162000
8       19.202667000     11.510121000     -9.336485000
6       18.697804000     12.476826000     -5.867315000
6       17.200284000     12.593398000     -6.257824000
6       17.097881000     11.710896000     -7.523763000
6       18.174379000     10.625882000     -7.353129000
6       18.877616000     10.259207000     -8.645692000
8       19.175961000     11.208661000     -6.407623000
1       18.802651000     12.493197000     -4.781053000
1       16.940167000     13.628866000     -6.457270000
8       16.309523000     12.210070000     -5.170722000
1       17.346822000     12.299555000     -8.407418000
1       17.745197000      9.729607000     -6.901650000
1       18.201003000      9.651628000     -9.258070000
1       19.798031000      9.708917000     -8.440222000
8       15.795154000     11.091605000     -7.698513000
7       20.825879000     16.843956000     -4.414674000
6       20.235829000     15.848432000     -3.655011000
7       20.127771000     16.064915000     -2.335509000
7       19.770886000     14.704312000     -4.191061000
6       19.933119000     14.633842000     -5.527042000
6       20.528652000     15.572994000     -6.365951000
6       21.022464000     16.784977000     -5.806793000
8       21.559002000     17.743236000     -6.425755000
7       20.475249000     15.141525000     -7.698853000
6       19.869107000     13.958811000     -7.670493000
7       19.505386000     13.602705000     -6.354960000
1       21.121007000     17.749451000     -3.947006000
1       20.438792000     16.945762000     -1.881498000
1       19.687120000     15.338603000     -1.782388000
1       19.711551000     13.302758000     -8.512018000
15      20.107672000     11.490485000    -10.725015000
8       19.351532000     10.832391000    -11.834795000
8       20.690952000     12.871818000    -10.804691000
8       22.292225000     24.317425000     -0.355886000
6       20.850961000     20.860231000      0.086801000
6       22.015481000     20.426556000      0.993154000
6       22.773577000     21.756631000      1.131852000
6       21.626946000     22.742820000      1.358320000
6       21.934871000     24.191490000      1.060847000
8       20.571867000     22.253122000      0.416956000
1       19.954077000     20.260522000      0.225633000
1       22.595117000     19.609850000      0.574228000
8       21.499414000     20.072623000      2.315827000
1       23.284696000     21.973177000      0.193454000
1       21.272058000     22.638053000      2.386217000
1       22.765828000     24.514678000      1.693353000
1       21.064524000     24.813620000      1.291930000
8       23.725562000     21.824541000      2.217593000
7       21.256706000     20.743842000     -1.339196000
6       21.185222000     19.457922000     -1.921604000
8       20.850155000     18.488562000     -1.173236000
7       21.465941000     19.330652000     -3.245369000
6       21.842824000     20.404838000     -3.990757000
7       22.052923000     20.243729000     -5.296205000
6       22.007290000     21.691921000     -3.371447000
6       21.692868000     21.824955000     -2.058459000
1       21.881974000     19.320738000     -5.746156000
1       22.181145000     21.070283000     -5.887382000
1       22.353164000     22.532809000     -3.950253000
1       21.788658000     22.757855000     -1.511312000
15      25.321967000     21.534374000      1.841713000
8       26.153679000     22.367618000      2.763936000
8       25.477534000     21.557042000      0.343537000
8       14.457730000     13.254623000     -7.833500000
6       14.018614000     16.668349000     -6.193038000
6       12.804344000     16.841199000     -7.123845000
6       12.628567000     15.413745000     -7.665034000
6       12.928736000     14.541278000     -6.441935000
6       13.464451000     13.157079000     -6.746797000
8       14.016342000     15.289022000     -5.745804000
1       13.988037000     17.346645000     -5.342790000
1       12.979815000     17.578430000     -7.907182000
8       11.625573000     17.178170000     -6.324117000
1       13.383832000     15.233978000     -8.427522000
1       12.050604000     14.485543000     -5.793129000
1       12.660545000     12.494470000     -7.072886000
1       13.964450000     12.753276000     -5.862066000
8       11.320201000     15.128800000     -8.216117000
7       15.289195000     16.939406000     -6.911005000
6       15.776609000     18.261583000     -6.875491000
8       15.020294000     19.151420000     -6.375857000
7       17.028870000     18.504487000     -7.342083000
6       17.780342000     17.507503000     -7.879965000
7       19.040323000     17.760818000     -8.231681000
6       17.226889000     16.189860000     -8.037255000
6       16.002213000     15.936659000     -7.514393000
1       19.460566000     18.689789000     -8.033116000
1       19.661491000     16.974498000     -8.449077000
1       17.801407000     15.414021000     -8.515280000
1       15.530110000     14.960481000     -7.553980000
15      14.747626000     11.881387000     -8.729391000
8       13.504460000     11.048241000     -8.765123000
8       15.507530000     12.335807000     -9.936639000
8       22.639146000     27.958035000     -4.544696000
6       19.467077000     25.303943000     -4.454003000
6       19.984123000     25.056752000     -3.015089000
6       21.108898000     26.097338000     -2.890442000
6       20.461821000     27.281385000     -3.614780000
6       21.378557000     28.429498000     -3.963355000
8       19.944214000     26.631954000     -4.851845000
1       18.377552000     25.242628000     -4.443633000
1       20.290331000     24.022967000     -2.848104000
8       18.851995000     25.426997000     -2.169546000
1       21.999223000     25.786567000     -3.438571000
1       19.628151000     27.643958000     -3.004821000
1       21.637450000     28.937300000     -3.031678000
1       20.869240000     29.116445000     -4.639656000
8       21.456217000     26.435614000     -1.525081000
7       18.113945000     21.001090000     -6.685603000
6       17.355336000     21.899325000     -5.954117000
7       16.073526000     21.588410000     -5.719161000
7       17.860406000     23.053022000     -5.482346000
6       19.159293000     23.227729000     -5.782169000
6       20.001447000     22.384743000     -6.504276000
6       19.464960000     21.179010000     -7.028795000
8       20.066451000     20.315965000     -7.736233000
7       21.296292000     22.924062000     -6.560772000
6       21.233667000     24.078620000     -5.901167000
7       19.938266000     24.306006000     -5.401461000
1       17.673297000     20.085033000     -6.998508000
1       15.648361000     20.682060000     -6.005212000
1       15.536008000     22.249571000     -5.169387000
1       22.018998000     24.822592000     -5.837426000
15      22.858573000     25.795752000     -0.883910000
8       23.179539000     26.622318000      0.321986000
8       23.811869000     25.504640000     -2.001828000
8       10.393388000     16.749870000     -9.951946000
6       10.945895000     20.460857000     -9.635345000
6        9.886726000     20.505028000    -10.745995000
6        9.190591000     19.125476000    -10.676155000
6        9.286493000     18.751379000     -9.177923000
6        9.489394000     17.261946000     -8.912587000
8       10.486009000     19.471124000     -8.667005000
1       11.040493000     21.447729000     -9.185609000
1       10.325218000     20.718899000    -11.725723000
8        8.910018000     21.497337000    -10.327166000
1        8.035220000     21.063686000    -10.575649000
1        9.688294000     18.369305000    -11.281051000
1        8.402417000     19.124743000     -8.653635000
1        8.523972000     16.745792000     -8.966541000
1        9.943447000     17.111815000     -7.930713000
8        7.820983000     19.377659000    -11.114346000
7       12.302505000     20.072204000    -10.075886000
6       13.305930000     21.063068000    -10.064144000
8       13.046138000     22.268450000     -9.875928000
7       14.580741000     20.583293000    -10.258984000
6       14.975826000     19.254130000    -10.437555000
8       16.196864000     18.961852000    -10.535044000
6       13.883553000     18.311472000    -10.473737000
1       14.038087000     17.251695000    -10.602828000
6       12.618468000     18.744190000    -10.267959000
1       15.352613000     21.325352000    -10.209223000
1       11.802619000     18.033287000    -10.212803000
15      11.154621000     15.271803000     -9.863973000
8       10.224677000     14.193755000    -10.323720000
8       12.514716000     15.495112000    -10.471482000
8       23.148407000     25.983050000     -9.076268000
6       19.325607000     26.839988000     -9.449861000
6       19.458194000     27.367045000     -8.004825000
6       20.966719000     27.335165000     -7.823395000
6       21.485273000     27.838879000     -9.177769000
6       22.910481000     27.365697000     -9.482685000
8       20.522521000     27.281819000    -10.162829000
1       18.417849000     27.215951000     -9.923556000
1       18.926302000     26.760321000     -7.269511000
8       19.017430000     28.755588000     -8.030140000
1       19.591575000     29.209461000     -7.349575000
1       21.301860000     26.318568000     -7.653700000
1       21.427180000     28.930427000     -9.199169000
1       23.591105000     28.049029000     -8.958070000
1       23.086506000     27.434842000    -10.559206000
8       21.419164000     28.214420000     -6.753874000
7       16.524054000     22.495597000    -10.064276000
6       16.121704000     23.784762000     -9.940610000
7       16.905138000     24.858083000     -9.737312000
6       18.219552000     24.533751000     -9.684008000
6       18.754027000     23.243029000     -9.812948000
6       17.850182000     22.171923000     -9.981084000
7       18.224631000     20.889673000    -10.058130000
7       20.148915000     23.276066000     -9.754035000
6       20.458392000     24.556172000     -9.587088000
7       19.313047000     25.368683000     -9.517575000
1       15.048215000     23.923243000     -9.992028000
1       19.158505000     20.635438000     -9.740229000
1       17.512646000     20.150992000    -10.207703000
1       21.456332000     24.972773000     -9.496653000
15      22.923190000     27.853374000     -6.140598000
8       23.904705000     28.892978000     -6.588395000
8       23.206290000     26.386395000     -6.468183000
1       36.564172000     10.275082000     -1.133832000
1       31.798041000     19.578503000    -14.613233000
1        7.264848000     18.567668000    -10.975890000
1       23.274762000     26.018828000     -8.050506000
1       12.674082000     18.978888000     -5.929704000
6       11.638372000     18.614058000     -5.912050000
1       11.050855000     19.183608000     -6.635392000
6       11.074835000     18.660409000     -4.524921000
16      11.035869000     17.186443000     -3.591486000
6       10.381513000     18.023386000     -2.215595000
1       10.151867000     17.489694000     -1.306245000
6       10.198964000     19.356795000     -2.472043000
1        9.794557000     20.056821000     -1.753830000
1       10.528957000     20.728641000     -4.197472000
6       10.595390000     19.723020000     -3.804505000
6       16.349564000     10.787237000     -4.774751000
6       15.696132000     10.721196000     -3.427791000
16      15.610895000     12.171059000     -2.461225000
6       14.859731000     11.306272000     -1.154575000
1       14.573970000     11.820214000     -0.249770000
6       14.682626000      9.981519000     -1.456217000
1       14.224610000      9.268421000     -0.784818000
1       15.112101000      8.651093000     -3.192040000
6       15.162444000      9.645102000     -2.768452000
1       17.392203000     10.448773000     -4.710968000
1       15.819807000     10.187676000     -5.517523000
6       21.684367000      9.387532000     -6.209297000
6       21.597369000      7.907986000     -5.989535000
16      22.381978000      6.833493000     -7.118737000
6       21.917804000      5.442877000     -6.185035000
1       22.181420000      4.449258000     -6.513114000
6       21.196755000      5.794230000     -5.074474000
1       20.802740000      5.080965000     -4.363812000
1       20.467314000      7.690163000     -4.157551000
6       21.009684000      7.214954000     -4.963808000
1       20.756709000      9.903226000     -5.949286000
1       22.509121000      9.812677000     -5.621383000
6       27.594080000     10.033175000     -9.680907000
6       27.532147000      8.545900000     -9.606402000
16      28.711265000      7.529059000    -10.393653000
6       27.925123000      6.090459000     -9.813221000
1       28.311142000      5.115204000    -10.066639000
6       26.817176000      6.385663000     -9.062111000
1       26.181983000      5.634704000     -8.613425000
1       25.759532000      8.260350000     -8.430083000
6       26.587382000      7.797523000     -8.950275000
1       26.692561000     10.438058000     -9.211660000
1       28.477424000     10.447757000     -9.179453000
6       18.991301000     25.034082000     -0.758719000
1       19.651024000     24.163094000     -0.663057000
1       19.436875000     25.856121000     -0.192290000
6       16.478786000     24.570010000     -1.038041000
6       17.608517000     24.689581000     -0.275238000
16      17.269719000     24.372097000      1.408868000
6       15.587358000     24.074073000      1.064395000
6       15.317531000     24.216334000     -0.269362000
1       16.488858000     24.731845000     -2.104442000
1       14.906573000     23.811740000      1.859136000
1       14.334055000     24.076483000     -0.696585000
6       20.796052000     18.760426000      2.307053000
1       20.701708000     18.414446000      1.269925000
1       21.399144000     18.035382000      2.854296000
6       18.542191000     18.049504000      3.389601000
6       19.447025000     18.971322000      2.930937000
16      18.842026000     20.598545000      3.103748000
6       17.353714000     20.020173000      3.788319000
6       17.334316000     18.653020000      3.880891000
1       18.720197000     16.982537000      3.378360000
1       16.584399000     20.712369000      4.093974000
1       16.503837000     18.089869000      4.284056000
6       24.622876000     13.727628000      1.423491000
1       24.062526000     14.064515000      0.540215000
1       25.566092000     13.288370000      1.084130000
6       23.567759000     11.447624000      2.077017000
6       23.812217000     12.784086000      2.255913000
16      22.973963000     13.404894000      3.654845000
6       22.280946000     11.845545000      3.985776000
6       22.682417000     10.907066000      3.072015000
1       23.994458000     10.866400000      1.270669000
1       21.636161000     11.701419000      4.838978000
1       22.374315000      9.870985000      3.100194000
6       29.909193000     10.441535000     -1.376592000
1       30.943539000     10.187477000     -1.621693000
1       29.518871000     11.067792000     -2.187659000
6       28.110818000      9.085651000     -0.149059000
6       29.034165000      9.243827000     -1.148246000
16      29.078782000      7.843222000     -2.191737000
6       27.828757000      7.054502000     -1.268841000
6       27.417270000      7.829848000     -0.219010000
1       27.948427000      9.839632000      0.605166000
1       27.475656000      6.075738000     -1.553968000
1       26.652369000      7.525858000      0.482271000
